# Supplementary material for: Integrative transcriptomic analysis in human and mouse model of anaphylaxis identifies gene signatures associated with cell movement, migration and neuroinflammatory signalling
Source: Front Immunol. 2022 Dec 8;13:1016165. doi: 10.3389/fimmu.2022.1016165 (PMC9772259; doi:10.3389/fimmu.2022.1016165)
Supplement: Supplementary file 10 [file Table_10.xlsx]

## Sheet: Supplementary Table 10
Supplementary Table 10
IPA Upstream regulators direction
The log fold change values were colored in red for positive values (corresponding to upregulation) and in blue value for negative scores (corresponding to downregulation). The detailed information on the pathways are available on the following address: https://targetexplorer.ingenuity.com/.
Upstream regulators	logFC_ED	logFC_DBPCFC	logFC_MOUSE
lipopolysaccharide	3.63476	3.19256	7.55015
IL6	3.30717	3.45209	4.74968
TNF	1.37139	0.980409	5.65007
prostaglandin E2	2.02807	2.57052	3.63539
cyclic AMP	2.36189	2.67139	2.63815
PTH	2.44044	3.76915	2.42194
MYCN		-2.41813	-2.26624
CSF2	1.27686	0.704499	4.60545
tretinoin	0.673414	1.98669	3.00681
poly rI:rC-RNA	1.55595		4.70525
NFkB (complex)	1.58378	1.75457	5.23611
IL1B	0.677929	0.839015	4.68539
PRKCD	0.375278	2.85168	3.32296
SB203580	-0.648933	-1.31076	-4.45491
TGFB1	2.35818	1.79674	2.85411
Alpha catenin	-1.73808	-1.81985	-3.80959
SP1	2.26548	3.90912	0.83157
IL13	1.02492	3.00748	2.25128
CSF3	1.53109	0.850494	4.55606
Creb	0.940678	3.74206	1.91899
IL17A	1.84934	0.742373	3.21534
TGFA	2.78543	2.59607	2.75408
forskolin	3.0695	1.60319	2.25877
EGF	3.80498	0.825309	3.49077
PDGF BB	3.37386	-0.00160308	4.04579
cytokine	1.72528	1.40794	3.73074
ERK	2.0711	0.850809	3.93088
calcitriol	1.95553	1.38315	0.757804
bucladesine	1.62371	2.30104	1.57584
H89	-2.58857	-1.23126	-3.42996
IFNG	2.0673	1.04301	4.73644
HRAS	-1.10363	-2.59817	1.87851
P38 MAPK	0.587092	1.49917	3.235
phorbol myristate acetate	1.58735	0.704285	3.97003
BDNF	-0.252208	3.59768
PTGER2	1.37281	-0.371391	3.15375
PI3K (complex)	1.42806	1.6327	4.15771
IL2	1.21512		3.43229
OSM	1.66826	0.860508	3.44823
PD98059	-1.78731	-1.46246	-3.28301
cisplatin	1.70301		4.5756
salmonella minnesota R595 lipopolysaccharides	1.73895		3.94257
EDN1	2.59643	1.10746	3.85826
PTPN1	-2.13767	-1.74416	-2.23607
IL10RA	-0.895167	0.450392	-5.30791
thapsigargin	0.5563	-0.805033	2.42886
MYD88	-0.151514	0.856279	4.4817
IL22	1.14373	2.9752	2.35886
TNFSF11	2.70269	2.296	3.19413
STAT6	0.110618	2.30397	2.82614
U0126	-2.69047	-1.17415	-2.83271
kainic acid	2.08302	1.40256	2.92417
HIF1A	1.58269	2.41585	2.71165
SP600125	-0.581318	-1.46792	-3.33725
TLR3	0.898558		3.75293
LIF	1.92696	-0.295021	2.45093
trinitrobenzenesulfonic acid	0.5264	0.722121	4.01078
E. coli lipopolysaccharide	0.0676747	-1.11577	2.78202
IL1A	0.136023	0.47186	4.20295
STAT3	2.05106	1.33316	3.415
NGF	1.94926	2.54409	1.65745
CREB1	1.80015	1.39906	2.3657
IL21	2.64649	2.63165	2.40565
Jnk	1.34708	-1.04938	3.68132
TNFRSF1B	1.4	2.308	1.96396
CpG oligonucleotide	0.316894	0.78165	3.35047
TLR7	1.08008		3.29081
Tnf (family)	-0.34318	-1.22216	3.34656
5-O-mycolyl-beta-araf-(1->2)-5-O-mycolyl-alpha-araf-(1->1')-glycerol	2.3094	1.26491	2.66789
SMARCA4	-0.0591312	2.4758	1.63347
TICAM1	0.536656		3.58511
dexamethasone	1.50371	3.12197	-0.370724
KLF4		2.787	1.99656
PPARG	1.56072	1.51103	-3.03
Ca2+	1.68388	1.26275	3.16693
E. coli B5 lipopolysaccharide	1.98508		4.62959
mir-21	0.0348188		-0.983577
E. coli B4 lipopolysaccharide	0.08583		3.40276
F2	2.58011	1.00826	2.90356
hydrogen peroxide	2.26771	2.12533	2.9799
norepinephrine	2.72087	2.39792	1.40708
ATP	1.64418	2.57763	2.08007
HGF	-0.0190422	-0.273383	2.21134
TGM2			4.53723
phorbol esters	2.58035	1.9666	2.89282
lipoteichoic acid	0.956183	0.914047	3.69553
IL5	1.96267	0.191451	3.87005
NOS2	2.22834	1.55769	2.45804
sirolimus	0.487486		-1.16607
PDGFB		2.59177	2.41234
LY294002	-1.67058	-0.882164	-2.79758
CEBPB	2.1352	1.59567	1.34561
dimethyl sulfoxide		2.57554	1.77811
ERBB2	0.115578	1.29019	2.30173
FOXL2	2	1.9799	2.08893
peptidoglycan	0.997509	1.50567	2.85843
CTNNB1	-0.690984	2.42387	1.28152
2-amino-5-phosphonovaleric acid	-2.35609	-0.659126	-1.38777
L-triiodothyronine	-1.17295	0.911862	-2.35128
Salmonella enterica serotype abortus equi lipopolysaccharide	1.5162		2.06197
SMAD4	1.16276	2.67406	1.46468
Lh	2.57512		2.09077
Vegf	-1.55466	-0.521889	1.3202
SELPLG	2	1.63299	3
ERK1/2	1.57436	0.124814	3.03377
TREM1	0.846154	-0.212583	2.57099
F2R	2.61281	1.76271	2.26181
TNFSF12	1.31488	-0.236747	3.52452
CD40LG	0.766941		2.74534
infliximab	-1.52753	1	-2.13767
pioglitazone	1.51647	0.65547	-3.14911
BCL6	0.555496	2.53537	-1.38621
FGF2	2.71288	0.861717	2.75442
Cg	2.41514	0.910007	0.963237
TCR	0.517562		1.44301
AHR	-1.72392	-0.970042	1.2471
Interferon alpha	2.11123		3.94845
N-acetyl-L-cysteine	-1.80672	-0.211305	-2.17936
mir-223	0.333333	2.32379	2.34377
NRG1	2.19751	1.21179	2.17139
IL1	0.582843	0.707538	3.04824
SB-431542	-1.74574	-0.862911	-2.34521
FOXO1	1.64278	-0.776898	1.62622
TGFB3	2.18643	2.02362	1.98457
EGR1	0.774917		1.94691
F3	2.23607	1.05393	1.63299
AKT1	0.282216	0.103758	2.01546
GH1	2.55822	1.22953	1.87013
dinoprost	2.21321		2.73777
APP	0.220211	0.519153	2.96187
actinomycin D	-1.84208	-1.94248	-1.16575
RELA	1.40449	0.421009	3.25308
Tlr	1.82904		3.65322
S100A9	0.554093	-1.6608	2.27559
etanercept	0.848528	1.59304	-1.98248
PGR	1.85868	1.50571	1.57037
MTPN		0.835109	2.6295
TLR2	-0.11709	-0.0801631	2.80163
resiquimod	-0.150989		2.69838
MAP2K1	1.55055	2.038	2.66754
diphenyleneiodonium		-1.76792	-2.20788
thioacetamide		1.66667	2.53837
SMAD3	1.32054	1.05635	2.23931
lipid A		-0.88752	2.60709
CCND1		-2.06845	1.91237
IL1R1	1.67748	1.53897	2.36247
IL3	1.94649		2.57395
IL18	0.684281	-0.0215416	2.87808
TAC1	-0.0593114	-0.294203	2.37801
NR4A1	0.648886	-1.91238	-0.762493
platelet activating factor	0.958858	1.11649	2.44857
resolvin D1	1.98248	2.42487
ZFP36	-1.22462	-0.251976	-1.63694
bleomycin	-0.00794527	0.504477	2.90115
ethanol	0.446226	2.2673	1.83186
AGT	1.27051	0.442534	1.60553
trovafloxacin	2.23607		2.82843
MAP3K1	1.95962	1.72727	2.18275
tamoxifen		1.98754	1.82085
mir-155	-1.40299	-2.20878	-1.97718
NUPR1	3.15296
CHUK	-0.369008		2.205
LDL	2.20559	0.430093	1.846
nitric oxide	1.11566		1.60814
5-fluorouracil			2.44949
CD38	1.83533		3.03077
TLR4	0.684969		2.62795
MET	1.91237		2.60862
MED1		0.265716	-2.79632
CEBPE		2.85461	2.08708
FSH	2.91276		2.2118
Bay 11-7082		-1.18976	-2.92253
captopril		0.988847	2.64456
Growth hormone	1.85171	1.38547	1.50035
NR3C2	1.34164	0.970378	2.37346
leukotriene D4	2.03897		2.64575
IRF6	0.128037	1.35158	2.60709
bisindolylmaleimide I	-1.67126	-1.54633	-1.10704
deferoxamine	2.71429	0.516445	2.16742
lysophosphatidic acid	0.909238	-0.374504	2.48027
DUSP1	0.478091	-0.0719745	-1.8181
ST1926			-2
EGFR	1.09411	0.788009	2.46462
FFAR3	-2	-2.3353	2.44949
hexachlorobenzene			2.98481
TSH		1.09483	2.42487
beta-estradiol	1.95938	-0.269126	1.61769
CD 437
SMARCB1	1.10404	2.11058	0.134043
EPAS1	1.0303	2.15008	0.837325
LEPR	2	1.2675	1.31995
DOCK8	1.41421		2.64575
Go 6976	-1.446		-1.7931
S100A8	1.12115	-1.18025	1.64317
carbon tetrachloride	0.242536	1.25306	2.37276
Calcineurin protein(s)	0.980566	1.93923	1.81497
MAP3K14	2.2		2.16362
doxorubicin	1.38923		2.5721
GAST	1.86096		2.7104
hyaluronic acid	1.12351		2.88045
E. coli serotype 0127B8 lipopolysaccharide	-1.31579	-1.54766	2.34573
TRADD	2.2188	0.27735	2.2188
formaldehyde	1.12828	1.41379	2.13793
VEGFA	1.16476	1.35826	0.656621
MAP2K5	0.927173	1.9799
ZBTB16	1.38675	2.9342	0.57735
CXCL12	0.982206		2.37803
C5	1.53638		3.35636
cholecalciferol	2.2188	1.63229	1.27616
cigarette smoke	0.452412	0.657057	3.03516
DETA-NONOate	0.927173		2.39147
D-glucose	2.24211	0.376122	1.17725
IL6R	1.09109	0.350772	2.40063
VDR	1.90071	1.84464
EIF2AK2	1.6636		2.93684
CD40	0.50126		1.20128
IL15	1.47451		2.06421
3M-001			2.42536
25-hydroxycholesterol	1.63299		3
RICTOR
TFAP2A	9.42055e-17	1.7085	-2.44949
TET2	1.34164		2.52357
PDLIM2		-0.534522	-2.23607
KITLG	1.06311		3.06228
R5020	1.93176	1.77651
TSC22D3		2.19393	-0.645772
8-bromo-cAMP	2.02823	2.24734	-0.109847
SAMSN1	1.1547		2.52982
GNRH1	1.73006	1.34164	1.39233
CD28	-1.90508		-1.6951
HNF1A			-0.419314
okadaic acid	1.1094	-0.457496	2.19279
NOD2	1.29406	0.177675	2.72615
S-(2,3-bispalmitoyloxypropyl)-cysteine-GDPKHPKSF	0	-0.928477	1.9799
emodin	-1.94766		-2.61281
IRAK4	-1.43208	-1.16157	1.15654
PRKCA	1.98248		1.7812
IL27	0.958684		1.9857
LEP	0.60666	1.44999	2.00919
MYC	-0.225753		-0.456576
Mek	1.91508	-0.666044	1.66696
Fc gamma receptor		-1.02821	1.94145
bromodeoxyuridine			2.23607
FN1	1.63676		2.56212
CD3	0.248176		1.55293
methotrexate	1.29154		-0.671591
Akt	-0.883966	-0.0521312	1.32309
SPI1	0.289993		2.78099
glucocorticoid	1.28562	1.34439	-0.56026
topotecan		-2.14374	2.04092
estrogen		2.34451	0.588188
IFN alpha/beta	0.415227		2.5568
SRC	1.52255		2.02893
potassium chloride		2.528	-0.399043
NS-398	-0.901665		-2.10385
reactive oxygen species	1.54604		2.16366
MAPK14	0.303661		3.20003
decitabine	0.316499		0.868484
TLR7/8	0.447214	-0.558914	1.88982
curcumin	-0.422502		-2.58487
miR-146a-5p (and other miRNAs w/seed GAGAACU)	-1.98248	-0.558914	-1.23625
NFATC3	1.94362	1.73205
herbimycin	-1.69775		-2.20122
Tgf beta	0.150112	1.03336	2.95133
MKL2	-0.816497		-2.12132
TSC2	0.640184	-1.21226	-2.17237
pyrrolidine dithiocarbamate	-0.192006		-2.91052
CEBPD	1.94766	1.75149	1.3716
F2RL1	0.695808	0.192141	2.40114
cyclophosphamide	0.225688	0.985355	2.57456
NR1H2	0.152499	0.258057	-2.93887
MAP2K4	0.762493		2.19977
Pkc(s)	2.17832		1.70527
homocysteine		-1.93215	1.46052
ciglitazone	1.04434	-0.367401	-1.69618
NFKB1	0.392961		2.58587
testosterone	-0.639249	2.30182	1.52776
miR-199a-5p (and other miRNAs w/seed CCAGUGU)	0	-2.7199	0
allopurinol		1.88982	1.92916
TP53	2.6548		1.31645
C5AR1	-1.06749		2.7913
PPARA		1.9695	-1.10824
MAPK1	0.216864	1.90454	1.91714
IKBKB	-0.520919		2.05753
cycloheximide	0.803065	0.380574	2.74795
histamine	2.32035	1.74824
IL12B	0.509432		2.64995
IRF7			3.30237
wortmannin	-0.234707	0.391068	-1.84123
FOXO3	0.690889	0.515444	1.90407
EOMES	0.937043	1.95741
dimethylnitrosamine		1.91237
KDM5B		2.04275
N-nitro-L-arginine methyl ester		-2.09866	-0.495225
IL23A	-0.356663	-0.546912	2.21321
INS	0.976092	-1.51429	1.11603
Sn50 peptide	0.398216	0.250696	-2.21052
CEBPA	0.810194	0.834464	1.30341
CD14	1.46059	0.0253755	2.01251
fingolimod	0.817624		-0.478091
methylprednisolone	1.75199	0.0619248	1.62165
GABA	1.98248	2.2188	-0.27735
MIF	0.125292	-0.719909	1.3597
REL	0.835249	-0.340843	1.45527
paclitaxel	-1.05393	-1.47295	0.611982
FGF1		2.74402	0.923381
KNG1		1.64312	1.94738
BRD4	1.67126		1.94145
tyrphostin AG 1478	-2.03491	-1.7669	-1.49509
tetrachlorodibenzodioxin	-1.08557	1.16914	1.6171
KRAS	0.102598		2.37289
CpG ODN 1826	-0.396725		2.33217
GC-GCR dimer		1.1717	2.2188
Ap1	0.202779	-0.173337	1.98065
cocaine	1.79027	0.663853	1.84241
CORT		1.7931	0
BCR (complex)	0.960933		1.90391
NFKBIA	1.402		1.93125
acetovanillone	1	-0.645311	-2.38521
INHA	-1.28745		-2.41512
olanzapine	1.35168		1.47959
medroxyprogesterone acetate	0.569803	0.398609	-1.60884
Pam3-Cys	-1.13137	0.278058	1.62945
CCL5	0.622908	-0.362236	1.67504
NFE2L2			0.232238
MAPK3	0.374429	0.335377	2.04199
ITGAV	1.9563		1.21387
Fgf		2.1693	1.4727
isoprenaline	2	1.71499
3-methylcholanthrene		1.65276	2.28896
IKK (complex)		-1.96396	-1
mycophenolic acid	0.816497		1.94257
SCGB1A1	1.15404	0.339422	-2.41595
THRB		1.34164	-1.73808
NFATC2	0.0812077	-2.47579	1.04027
GLI1		1.97453	2.2252
GnRH-A	1.9799		2.1564
ANGPT2			2.78947
TGFBR2	0.593561	1.67598	1.41
A23187	0.225148		2.46152
WNT3A	-1.50756	1.42791
Nr1h	0.239046		-2.85875
ELANE		0.859727	2.20807
Ifn gamma	1.04227	-0.249838	1.50695
MAP4K4			1.24188
PSEN1	-0.28843	-0.642329	2.39802
MGEA5	0.774597	-1.77088	1.13389
tributyrin	0.896258	0.333333	1.84115
JUN	-0.362608	-0.0625079	1.57677
methamphetamine		0.442669	2.3918
bee venom	1.00953		1.42732
rolipram	1.38675	1.71973	-0.896258
arsenic trioxide			2.55352
Irgm1
TLR9	1.02133		2.19673
RAF1	0.84		1.75997
CSF1	1.48245		2.30335
PLAT	0.297514	0.0356614	2.36033
deferasirox	2	0.447214	1.13389
RORA	1.2861	1.88433	-0.6
MAPK7		1.19319	2.2188
IRF4	0.33221	1.99592	-0.259082
CTF1			2.18229
monophosphoryl lipid A		-0.385429	1.56585
Pro-inflammatory Cytokine		1.7085	2.23607
Mapk	0.440499	0.293579	1.94895
PRL	-1.27222		1.89537
FOXA2	0.218218	1.03917	-1.86551
PTGS2	1.02387	0.326909	1.826
ethylene glycol tetraacetic acid		0.168497	-2.44949
vancomycin			2.97044
FOXM1		0.627975	0.224813
staurosporine	-0.128037	-1.066	-2.03898
camptothecin	2.52982		1.12724
plicamycin	-0.447214	-2.0257
stallimycin			2
tunicamycin			3.06214
RIPK2	0.228472		2.02974
ciprofibrate		-0.597983	-1.63174
IFNA2	-0.961664		2.36634
GHRL		2.03887	-0.850595
fatty acid	2.40114		0.795656
carrageenan			2.39002
C3	0.475191	-0.199414	2.65278
SLPI	1.98248	2.2
dihydrotestosterone	-1.06746	1.44209	-0.690622
MYOCD		1.53825
IL12 (family)	2.12788		1.32611
SGK1		3.04589
1-methyl-4-phenyl-1,2,3,6-tetrahydropyridine			2.57575
SRF	-0.311496	0.810524	-1.1136
baicalin		0.478091	-1.787
NR3C1	1.48823		-0.742884
phenylbutazone			2.22349
TERT	1.69486		1.99174
CRH		-0.242938	1.74297
ECSIT			2.75883
IL12 (complex)	0.516154		2.2156
TFRC	-2		-1.13389
etoposide	1.96931		1.47915
TBK1	-1.11688		1.13389
MAP2K1/2	1.53162	-0.0265607	2.37573
targinine	0.845154	1.54919	1.78737
PTHLH	0.130189	2.01101	1.22426
fenamic acid			2.79977
SASH1	0.707107		1.88982
hemozoin		0.640184	2.39492
STAT1	-0.417999	-0.00666343	1.48965
morphine	-0.386417	1.69337	1.35924
isoproterenol	2.4004		1.52865
ethionine			2.44949
triamterene			2.8
anisomycin		0.260544	2.17846
SOCS1	-1.4687	-0.0153041	-2.37722
RAC1	-0.275611	0.998891	1.78017
nicotine		1.01333	1.58613
10E,12Z-octadecadienoic acid		-0.569803	2.04849
NEUROG1	-1.88982	-0.707107	-1.13389
cobalt chloride	1.96895	2.18246
risperidone	1.94145	1.98248
sphingosine-1-phosphate	1.38113		0.477206
KRT17	1		2
EPO	2.30778		1.43415
ionomycin	-0.0201936	-0.0154021	1.06356
MAP2K3	-1.19925	1.2173
SFTPA1	-0.816497	0.419297
GAB2		2.20043
3M-011			2.20723
Ifn	-1.03226	-0.492693	1.70561
MALP-2s		-0.086711	2.77944
CCL11			2.34003
mir-127		-1.83567
gentamicin C			2.81272
CSF1R	0.762493		2.42536
valsartan		-0.896258	-1.97712
ESR1	-0.688731		-1.77577
2,3,4,7,8-pentachlorodibenzofuran		1.46261	1.1094
spironolactone	-0.130189	0.649722	0.8409
PLAU	1.06749		1.80595
11,12-epoxyeicosatrienoic acid	2.17663
KLF6	1.21646	0.290043	1.17656
Immunoglobulin	0.730795	-0.392847	-1.79875
Collagen type I			2.23607
alitretinoin	-0.922633	-0.871702	-0.807256
Pka	0.646997	-0.199604	1.74078
SAA1		0.775515	1.99323
CDKN2A	-0.388514		0.228416
streptozocin		-1.02522	2.08826
GW3965	-0.670613	-1.2171	-1.26791
2-bromoethylamine			2.81272
IL4	1.18261	1.62796	1.33782
REST		-1.95379
eicosapentenoic acid		0.40893	-2.81132
ELOVL5			2.62071
INPP5D	0.774167	2.07549
VitaminD3-VDR-RXR		1.21053
DACH1		-1.98248	-1.98248
diethylstilbestrol	1.14837	0.359443	1.38287
PPARGC1A			-2.58958
CDKN1A			0.725866
dalfampridine			2.81272
FLT3LG			1.73205
ASCL1	0.152499	1.81071	1.25357
PDCD1	-1.02899
IFNL3	-1.09109	-0.928477	1.18792
cholesterol	0.125767		1.37436
miR-125b-5p (and other miRNAs w/seed CCCUGAG)		-1.74219	-1.45032
(+)-MK-801	1.29422	0.683257	-2.38709
STAT5a/b	-0.164399	-1.07024	1.90024
MAPK12		0.974695	2.19531
dextran sulfate	-0.67402	-0.401396	1.00939
NMDA Receptor		2.6295
Insulin	1.54826	0.183299	-0.448094
pirinixic acid			-2.21975
CREBBP	0.807573	1.71563	0.996562
BTK	-0.242536		2.14431
lomustine			2.64575
corticosterone	0.218218	-5.61983e-17	1.28191
SOX4	0.727607
ABCG1	1.71499	1.70926	-0.59612
EGLN1	-2.23607		1.08661
SMAD7	-0.569558	-0.809683	-0.706063
paraquat		2.19989	1.4348
RNASE2	-0.617822	-0.8	2.2188
E2F2		-2
PGF	1.92916	-0.674907
carbamylcholine		2.1856
let-7			-1.57582
HDL			-1.8332
USP7		-1.73205
thalidomide			-2.16251
doxycycline		-1.9803	0.389893
aldosterone	0.787655	0.202746	1.60275
uric acid	-0.989863	-0.710345	1.86183
DNMT3B		-2.35702
troglitazone	1.07803	-0.628422	-1.23398
RET	0.070691	-1.04442	2
OSCAR		1.94145	2.12132
RARA	-0.475191	-0.205781	-0.718421
RBPJ	0.177822	-1.81641	-1.14681
verapamil
IGF1	-0.0401312	0.419445	1.37044
phenacetin			2.44949
IL1RN		0.398353
GSK3B	-0.966282	-0.843809
5-hydroxytryptamine			1.72189
Ras	0.0431431	-1.06088
NCOA2	-0.745194		-2.01907
HTT		-1.36729	0.447214
ITGA5	1.12491	1.88419	1.00766
ssRNA40			1.673
SOCS3	0.642119	0.753443	-0.838834
SU6656			-2.80365
PP2/AG1879 tyrosine kinase inhibitor	-1.19883		-0.770888
IL7	0.833968		1.42496
PTX3		-1.31259	-1.5425
HBEGF	1.94766	-0.894737	0.730474
CXCL8	1.95772		1.51907
NLRP12			-1.96396
mono-(2-ethylhexyl)phthalate	2.2188		-0.891656
TCF4		0.806979	2.2188
L-glutamic acid		2.29163	1.9932
Collagen type IV	2	-1
IFNE			2.2188
RETNLB			2.44949
BTNL2	1		1.19523
BAPTA-AM	0.762493		-0.632681
BCL3	-0.958315	-0.46199	-1.91005
KMT2D		1.76336
mevalonic acid		-0.816497	2.20723
HMGB1			2.02733
GCG			1.38455
alefacept	-1.70561		-1.13389
F7	0.447214		2.18368
GNRH		2.0248	1.50132
MAP3K8	0.514496		1.37654
lipoarabinomannan		1	1.67126
1,2-dithiol-3-thione
zymosan	0.196741		2.70667
EP300	0.28444	0.585726	1.008
mir-146		0.963609	-1.84329
GATA2	-2.07018	-2.04805	0.937166
ADRB2		2.42487	1.67126
SAA		0.609699	2.16679
STK3
POR	-2.2188		1.19523
MMP9	1.42463	1.8549
CXCL10	0.275298	-0.0594799	2.18259
BMP2	-0.71789	1.5891
bicalutamide	-0.152499	-1.98248
ANXA1	1.96865		-1.56629
S100A6			-1.34164
SNAI1		0.307794	1.98248
HDAC1	1.45204
RPS6KA5		1.33608	2.17983
Secretase gamma		0.582182	2.04488
HDC		1.94145
IL10	1.90726	1.06572	1.7131
ARHGAP21	0		1.63299
ADAMTS12	1		-2.62109
AREG	2.55117
cis-urocanic acid			1.43208
TFAP2C	-1.38675		-1.02565
ELK1		1.72836	1.52764
17-alpha-ethinylestradiol	-1.2096	0.779221	0.157867
salmeterol		1.96559	2
ZMPSTE24		2.21321
Y 27632	-1.9799
CD200		0.489113	-1.99378
NOTCH1		-1.16465	-0.777029
TMEM173		0	2
apigenin	-0.984732	-1.45651	-1.52753
tert-butyl-hydroquinone	1.46059		1.44005
ESR2	1.31995	0.52475	1.03031
OLR1		-1.99655	1.67126
AR	1.74171	-0.139738
22(R)-hydroxycholesterol		-1.99323	-2.17762
EGR2	1.25357	3.04256
JUNB		1.37629	1.10704
5-N-ethylcarboxamido adenosine	1.32592		0
colchicine			1.94145
carboplatin		2	1.34164
bicuculline			2.37103
MBTD1	2	-2
IFNA4			2
GDF2	-1.78227	1.1547	-0.103695
KN-62			-2.2188
1,4-bis[2-(3,5-dichloropyridyloxy)]benzene			1.1767
TLR5			2
valproic acid			-2.45269
ELAVL1		0.651339	1.58715
ibuprofen		-1.75096	-0.67402
NR1H4			-1.08729
Am 580	0.490314	1.73205	0.762936
COL18A1	-0.524142	-0.798621	-0.426401
ADRB	1.41421	-1.8462
TP73	1.27284	0.624286	-1.16665
RUNX2			1.95283
LGALS3	-1.96549	-0.962393	-0.928477
prostaglandin D2	-0.635708	0.776383
CD2
5-azacytidine	2.17592	1.40732	1.11688
C3AR1	1	0.447214	1.94605
benzyloxycarbonyl-Leu-Leu-Leu aldehyde	1.07575	0.316097	-0.24109
imiquimod			1.7085
DCN	-1.1306	-1.82953
IKBKG	-0.923381		1.9435
fluticasone propionate	0.433555	0.276026	-0.537796
PRKCQ	-0.415245	-1.94855
IRF1			1.65805
PARP1	-1.06025	0.0836456	1.92694
dehydroisoandrosterone	0.5547	1.96396
simvastatin	0.911011	-0.686301	-0.934971
CAMK4	0.462168	0.679659	1.92916
nitrofurantoin	-0.388514	0.5	1.96116
RNF20	-2
Hbb-b2
Hbb-b1
let-7a-5p (and other miRNAs w/seed GAGGUAG)	-1.94426
Ccl2	-0.532552	0.290191	1.91404
PRKCE			1.40087
bexarotene	0.113961	1.2494	-1.09116
N-formyl-Met-Leu-Phe	1.47409		1.63053
FYN	-1.94145	-0.870936	0
MST1		1.69775
INSIG1	-0.377964	-1.55406	1.12719
mifepristone	-0.437946	-1.70695	0.747694
corticosteroid	1	1.91237	0.816497
bisphenol A	1.40556
IL23			0.447214
IL17RA			2.44224
ID2	-1	-1.6636	-1.60863
erlotinib			2.64575
HDAC6		1.94362
calphostin C	-1.98248	-0.341882	-0.671195
TNFAIP3	0.896258	0.221874	-1.99435
candesartan		0.128037	-1.38675
tacrolimus	-1.23489	0.570804	-0.983874
ITGA1		-0.368152	-1.0352
NTRK2
Pdgf (complex)			1.59399
chloroquine	-0.128037		-1.57917
Brd4	1.63299
CYP27B1		1.94766
triamcinolone acetonide	0.307794		-1.89318
PCGF2		1.11124
MERTK	0.27735	1.34145	0.66519
arsenite			0.699918
8-chlorophenylthio-adenosine 3',5'-cyclic monophosphate	1.99378		1.41421
leukotriene B4			1.07648
vitamin D		1.24818
TAL1	-1.94684
KLF2	0.578947	0.0539251	-0.484983
9,10-dimethyl-1,2-benzanthracene	1.96865		0.22493
PEBP1			-1.63299
BMP4	-1.80347
bardoxolone methyl		0.113961	-1.9799
MOG	-1.28733	-0.710274	-0.152499
EHF	1.25357	1.1547	1.46261
PIK3CA			1.71499
IKBKE
PTEN	-1.59575	-1.32819	0.7705
n-3 fatty acids		1.9799	0.0678844
oleic acid	0.882498	1.36637	0.181094
losartan potassium	-1.38675	0.938743	-0.540313
eplerenone			-1.70958
SQSTM1	2.23607
carbon monoxide			-2.31297
N-methyl-D-aspartate		1.18392	1.32368
GATA3	0.426266	-0.70913	-1.38638
CD209			1.95962
ADCYAP1	-0.542821	1.6055
Sb202190	1.97566	0.130211	-0.529362
CALCA		2.39111	0.721032
advanced glycation end-products		-0.242536	1.95283
INSR	-0.5322
gentamicin			2.11058
JAK2	1.17595		1.24326
SCAP			-2.59918
sorafenib	0.136964	1.90868
TNFSF14			1.98688
vinblastine			2.4327
TLR6
NODAL		1.34164	0
JAK1			1.98248
IRF8	-0.428088		2.46426
IL17C			1.32924
3,4,5,3',4'-pentachlorobiphenyl		1.55406
PP1			-1.95283
BTC			0.447214
salicylic acid	0.28444		-1.26896
MAPK8	0.889685		1.19869
SREBF2		0.601506	-1.75792
Gm-csf			2.62119
TGFB2	1.06749	0.57122	1.30904
TNFSF13B		2.00715	0.864923
AGER	-0.468521		0.912767
POMC	2.02857	-0.346967
SERPINF1	-1.71791
2-(4-acetoxyphenyl)-2-chloro-N-methylethylamine	0.727607	1.39623	-0.152499
Pam3-Cys-Ser-Lys4	-0.162573		1.76969
SATB1	-2.2003		-0.425231
telmisartan			-1.19523
NOS3			2.2188
cyclooxygenase		2.18938
silibinin		-0.919069	-1.95775
PTPRJ	0.377964		1.66667
IL11		1.29036	1.01587
RABL6
SELP		0.27735	1.51951
rosiglitazone	1.69978	0.317078	-1.13196
trichostatin A	0.468537	1.06177	-0.206045
IL12A	0.112311	-1.34407	0.95906
PTPN6			-1.34164
diclofenac		-1.4	-0.978523
STAT5B	0.103695	0.269032	1.41177
isotretinoin	-1.96782	-2.01907	-1.2376
APOA1			-2.59773
LCK	0.470632	0.470632
caspase
JAG2		-0.0526316	-1.66448
CAMP	-0.098773		1.48148
PRKCB			1.97738
IGF1R	2
101.10 peptide		-1.13137	-1.98052
Notch	-1.23828	0.930484
IgG	-0.808839	1.17962	-0.57492
EZH2	0.762493	0.538462
NKX2-5		2.19089
FGF10		0.862662	2.21565
mir-24			1.96865
rimonabant		0.691564	-0.281524
CYP2E1			2.42949
lipoxin A4		1.86562	-0.882498
enterotoxin B	-0.341389
CYR61	-1.06749	-0.285525	1.4814
N-cor			1.46261
bile acid		-1.97697	0.392232
TNFSF15			2
STAT			2.38247
TO-901317	-0.467606	0.374265	-1.20992
LTA		-0.737119	2
AG490	-0.27735	-0.1406	-0.565466
VIP	0.292659	1.15536	-1.34016
sodium orthovanadate
NR1H3			-1.90419
CD44	0.923381		1.28861
IFN Beta	-0.152106		1.3253
FOS	0.652045	0.603959	-0.991661
EHHADH		0	1.98248
inosine		0.646997	1.96865
4-hydroxytamoxifen	-0.024336		2.21604
PPIF	0	-1.89737
MKL1	0.282216		-0.802572
pyridaben		2.23607
linoleic acid		0.79324	2.78947
HNRNPK		-1.34164
NR4A2	1.13137	0.861742
MYOD1		1.95171	0.506189
H-7			-2.15981
ICAM1	0.855545	0.0384338	1.07648
tanespimycin
dexamethasone phosphate	1.63299		0.447214
desmopressin		2.62109	0.152499
APOE	-0.747665	-0.236741	-1.17384
Ngf			1.48907
ADIPOQ	-0.041808		-1.42269
progesterone	0.547706	1.0931	-0.310836
ITGB3	0.713714		1.2464
4-methylnitrosoamino-1-(3-pyridinyl)-1-butanone			2.06126
MARK2		0.447214	1
gefitinib			-1.43208
NADPH oxidase		0.752947
KMT2A		1.46261
ITGB1	1.0197	-0.742956	0.512027
THRA		1.78208	-0.341882
palmitic acid	0.646997		0.850182
3M-002			2.23227
Ro31-8220			-1.74666
raloxifene	-1.50756		0.904534
CYP7A1			-1.96865
indomethacin		0.860826	0.209285
PTGES		0.139947	1.97246
TRAF2	1.63158	-0.103936	0.426401
PLCE1		-1
CpG ODN 1668	1.21854		1.09541
PRKAA2			-1.90729
NGFR
LCN2	-1.27056	-0.671302
15-deoxy-delta-12,14 -PGJ 2	2.01021	-0.372722	-0.595985
maneb		1.88982
IL-1R			1.9868
PELP1			-1.34164
SCD			-2.02799
PTPN11	1.20593		0.184383
cerivastatin	0.896258	0.600383	-0.746729
CDH1		0.55883
NFKBIB		-1.93733	-1
PTK2		2.37236
SPIB
THBS1	0.0678844	-1.94145
IL27RA	-0.285049	0.832118	-1.66448
NEDD9	1.06749		1.38675
HSD17B4		0.447214	1.98248
SHH	-1.01274	1.21115
SB 216763	1.98248		-0.30949
MAC			1.16518
FGF21			-1.23509
TP63	1.15356		0.949891
HLX	-1.73205
NOTCH3		-0.135182
SOCS6	-1		1
heparin	1.38675	-0.616259	0.749269
prednisolone	1.90516		-0.381802
RUNX3	0.383914	-2.08932
CD24
IRAK3	2
Ifnar	-1.93449		0.478091
BAX
AGTR2		2.21565
Nfat (family)
butyric acid	0.570359	0.732819	-0.0297212
TICAM2	-1.9799
dibutyl phthalate	0.22493
NRIP1			-1.2958
PPP2CA
Hedgehog
tranilast		1.03268
MAPK13			1.96865
RXRA		0.480166	-0.812143
SSTR2		1.34164	1.1094
TYROBP			1.2636
TNFSF10	-0.558661		2.31544
TCF3			0.320256
PIK3R1	-0.075356		0.128037
3-nitropropionic acid
IGF2		-0.864137	1.17595
sunitinib	-1.06749	-1.24482
indole-3-carbinol		-1.98248	-0.848528
methapyrilene	-1
MEOX2	-0.447214
miR-155-5p (miRNAs w/seed UAAUGCU)			-1.96148
lactic acid	0.0249922	0.689463	1.15404
POU4F1		1.86213
NCR2	2.2188
picrotoxin		1.06749
SP3	0.390567	-1.41718
triflusal		0.0639816
VHL	0.392232	-1.77836	0.83035
IFNAR1	0.0908312		1.33062
FOXA1		0.509067
androgen	0.77588
ATF6
IL33	-0.626238		1.59238
CXCL1			1.9799
Pdgf Ab	2	0.339422
benzo(a)pyrene			1.20763
Hdac	0.050157	0.462836	-0.327207
9Z,11E-octadecadienoic acid			1.40556
misoprostol		-0.6	1.98248
CNTF			2.37243
Gsk3		0.306448	-0.113961
GDNF		2.17644
aspirin	-0.81771		-2.10883
S1PR1		1.96652
AMPK			0.436564
fulvestrant	-0.365148		-0.899026
MECP2		1.32572
ATF2	-0.0949158		1.65741
TSLP			2.20166
estrogen receptor	0.307794	1.09374	0.201581
ATP-gamma-S		2.1927	1.22614
Collagen Alpha1
H2AFY	-1		-0.640184
nifedipine		-0.322871
2,3 butanedione monoxime		2.2188
APC			0.970143
FCGR2B			0.152499
LGALS1	0.943456
RXRB		1.67126
Aldose Reductase		-1.09109
bezafibrate			-1.94666
RIPK1		-1.95283
CST5			-0.569652
lysophosphatidylcholine			1.40556
ESRRG			-2.58613
KDM5A
asoprisnil	-1	-1.66448
adenosine			1.52825
SPARC			-1.88982
butaprost	-0.764706	-0.0344589	0.988483
BACH2	0.193369	0.480384	-1.63299
FGF19			1.50111
IKZF1	1.09109	0.416598
DBI			-2
AGN194204	0.684211		0.69862
lemairamin			-1.99919
GW9662		-1.14844	1.37199
PRDM1	0.102598	0.208738	-0.707231
rotenone	-0.762493	-0.602464
W7		-0.57735	-1
nimesulide			-1.99174
E2f
Ptprd		1.63299
mir-27		-2.17013
TNFRSF1A	-0.670478	0.608308	1.11285
SOD1			-1.98248
ACACA			1.9799
AURKB			-2
PIN1		1.10631	1.5187
OPRM1		2.20043
LILRB4
RPS6KA4		1.98766	1.96309
bisindolylmaleimide			-1.98248
ALDH1A1			-1.96865
HMOX1	-0.174151	1.01881	0.0692284
fenofibrate			-2.08377
histone deacetylase	-1.63299
picryl chloride		-1.95962
RBL2
sodium selenite			-1.19208
CCL2	-0.287348	0.0946688	0.597458
ACOX1		0.487343	1.08856
CCR2	0.246718	-0.207494	1.19523
PROC		-0.146698	-0.677544
SCARB1		-0.140028	1.94145
PLG	-0.447214	-0.297567	0.650945
HSPD1			1.1717
lithium		2.21321
epigallocatechin-gallate	0.0849601
ADM2		1.7085
ERBB3	-0.956183		0
ERBB4	-1.88982	-0.0982386	-0.254664
galactosylceramide-alpha		-1.00511	0.659126
POU2F2			0.904534
IL2RA		1.38675
ROCK2			0.900366
beta-carotene			0.852803
ATM			2.17571
silicon dioxide		-1.18279	1.06749
CTLA4	0.324236		0
RASSF1	1.12858		-0.6
ZBTB20			-1.88982
Ige	-1.74167		-0.431517
PDE4B		-1.19883
haloperidol	0.361852	0.870316
MAVS	-0.421825
SPDEF		-2.12132
NR0B2			2.06546
phenylephrine
xanthohumol		-0.72111	-1.21854
PCYT1A		2
6-hydroxydopamine	0.848528	1.44055
iloprost		2.19036
CFTR	0.727607		-1.36201
IGFBP3		1.93733
crocidolite asbestos			1.97246
CHRNA7		1.46052
STAT4	0.638625	0.391965
ABL1			1.93474
CEACAM1		1.19523
MITF	1.01865		0.718421
memantine	1.92154
GW 4064			-1.23333
DMD		0.5547
CYP19A1			1.7669
phytohemagglutinin	0.256411	-0.223387	0.0180041
atorvastatin	0.507093	0.685022	0.13201
SPP1	-0.42715		0.336054
enalapril			1.06749
U73122			-1.96865
imatinib		1.84731
XIAP
FOSL1	-0.0241896	-0.364686	-0.60474
glutathione			-1.94145
oblimersen			2
RNASE1	-0.152499	-1.06749
tosedostat
GDF9	-0.829401		1.622
JUND	1.38675		0.970143
TLR1
quercetin	1.21042	1.18319	-0.41382
PIK3CD	0.0223328
monensin			-0.848528
ADRB3			1.96865
CA074-methyl ester			-1.96865
mir-29	0.624695	-1.45895	1.00859
MST1R		1.98248
phorbol 12,13-dibutyrate			0.675088
kaempferol		-0.5547
GPS2	0.447214
ID3	0.0561656	0.557086	0.184115
FGFR2	-1.98248		0.478913
Il3	0.480996		1.52248
HAND1			2
CRYAB
AGPAT2			1.13137
MBD2
mir-196		-1.96396
CD86	0.413231
hydrocortisone	0.640184	0.11723	-0.857993
FOXO4			0.544489
CASP8	0.57735	0.463699	0.991492
ALB		-1.06878
KLF5	1.53162
BRCA1	-0.506925
YAP1			2.21321
TCL1A			1
erythromycin		0.132453
MKNK1
Integrin	0.784465
chloropromazine			-1.06749
alvocidib
N-acetylmuramyl-L-alanyl-D-isoglutamine	-0.293105		1.81587
TBX2
NKX2-1		1.23463
Fcer1	-0.321329	-0.477996	1.10163
MTOR	0.562315		-0.0709773
BMS-690514
FCGR2A		-1.40707
salvin		-0.390567	1.21387
NCSTN			-1.63299
gemfibrozil	0.155334		-1.01419
lovastatin	1.28534		1.33062
cyclosporin A	-1.99046		0.0331641
BMP7		0.567458
NPPA		1.76162	-0.0678844
D-galactosamine		-0.0734966	0.816497
ATF4			0.226572
betulinic acid			-1.06749
RHOA
fluoxetine		1.85089
8-(4-chlorophenylthio)-guanosine-3', 5'-cyclic monophosphate		0.762493
PLA2G2D			-1
Collagen type II			0.6
NKX2-3
LIPE		1	-0.185695
ceruletide		-1.50614
2,4-dinitrofluorobenzene		-1.99687
S-nitroso-N-acetyl-DL-penicillamine
ZEB1		-2
MAPK11		1.95962
IDH1			-1
CDK4/6		-2.23607
TXN			0.468521
WNT5A	-0.862662		1.42538
ERG	0
lactacystin	0.779844	0.0383263	0.30818
STK11	1.49741	-0.515339	0.201606
epinephrine	1.2464	1.22546
vitamin E			-0.377964
GATA6	0.130051	0.644881	0.864522
deoxycholate			1.61165
anandamide		1.95432	0.720637
IL19	1.34164
CX3CR1		1.94145
nitrofen
TNFRSF9		-0.100456	0.862662
TWIST1		-1.09066	-0.0394976
trans-hydroxytamoxifen	0.447214	-0.83205	1
titanium dioxide		-0.536895
seocalcitol
acrolein		1.34164
IFNA1/IFNA13	-1.08918		0.787562
mir-10	0.762493		-1.37972
NEUROG3
miR-124-3p (and other miRNAs w/seed AAGGCAC)
docosahexaenoic acid	-0.213201		-1.46811
L-685,458		0.654654
ITGAM			1.09938
WWOX
PPARD	1.47292	-0.805452	-0.527319
IRS2		1.98248	-0.714382
RETN	1.1717		0.272367
INHBA	0.260652		0.720538
PF4
CGS 21680	-0.590554	0.895217
ITGA4			-1.34164
PCSK1		1
CIP2A			-1.19523
MYBL2		-1.37199
Hsp27			1.4
STAT5A	0.152106	-0.419314	0.0938359
SST		-0.92582
NFATC1	-0.89997
CAV1		-0.0319275	0.0628695
PAF1
ALOX15		-0.883373	-0.48911
metformin	0.730297	1.23612	-0.204622
FASN			-1.45521
S-nitrosoglutathione	0.593732	1.31322
ETV4			0.941138
ITGB2	0.943456	8.07806e-17	0.436436
MYB		1.14635
anakinra		1.34164
FST		1.08643	0
DEF6	0.773545	1.92805
acetaldehyde		1.06749
IL6ST			1
cardiotoxin
HDAC3
4-hydroxynonenal		1.23091
SOX2
amphetamine		1.2218
CHD4
geranylgeranyl pyrophosphate		-0.896258	1.06749
TRAF6
RELB			-0.294118
MEF2A		0.447214
CCL3	0.339422	0.0538382	0.928477
pregna-4,17-diene-3,16-dione			-1
gamma-linolenic acid		1.34164	0.447214
NOX1		1.11915
triptolide	0.749532		-0.805194
TAC4
SL 327		-2.4327
NOV		-1.41421
NFAT (complex)
PLAUR			1.446
mir-132		1.49137
REN
C/ebp			-1.53897
glycine		0.737119	-1.10265
Sch-23390		-1.91788
SNCA	0.250943	-0.360124
CCR5	0.808465	-0.336426	0.28
benzene		2
NR1I3		-0.426459	1.17976
carbohydrate			-1.19523
CBFB
clodronic acid		-0.757271	0.270719
BMP6			1.40933
entinostat			0.494575
YY1
rifampin
MAPKAPK2	0.552074	0.117343
PRKAA			1.03923
fluvastatin
NRG (family)
E2F6
PPP2R5C
evodiamine
sodium chloride		0.674497
ADORA2B		-0.5547	0.152499
Igm	-1.98052
tempol
PCGEM1			-1.96865
2-[[9-isopropyl-6-[[4-(2-pyridyl)phenyl]methylamino]purin-2-yl]amino]butan-1-ol
CDKN1B			-0.239046
linolenic acid		1.21268	9.42055e-17
PKD1		-1.77979	-2.35975
UCN		1.91849	-0.091421
ST3-Hel2A-2
napabucasin
Shc
cilostazol		1.52632
miR-34a-5p (and other miRNAs w/seed GGCAGUG)
conjugated linoleic acid	-1.06749	0.6	-0.5547
CTSB		0.848528	0.827981
L-dopa	0.829401	0.420946
TCF7L2	-0.777029		1.27091
UCN2		-0.415227
miR-291a-3p (and other miRNAs w/seed AAGUGCU)
WT1	0.0703606
8-bromoguanosine 3',5'-cyclic monophosphate		2.21321	0.05547
MSC
MIR124		-1.26025	0.494242
MEF2D
NR1D1			-1.4
WNT1
AKT2		2
NCOA4			-0.522233
1'-acetoxychavicol acetate
Pkg
methyl methanesulfonate
PIM1
HNF4A	-1.76559		-0.580518
ARNTL			-1.47762
myristoylated protein kinase A inhibitor 14-22 amide		-1.9799
CRP		2.2
USF1			0.20833
Ikb
pristane
POU5F1
nitroarginine			1.19208
miR-17-5p (and other miRNAs w/seed AAAGUGC)
CCL4		-1.95962
KEAP1
miR-141-3p (and other miRNAs w/seed AACACUG)
sulforafan	0.963338	0.971676
XDH	-0.183639		1.14459
NFkB (family)			1.06749
astragalin		-1.06749
JAG1	0.593732	0.89448
NFKB2	0.735767		-0.367884
H2AFB3 (includes others)
fish oils		1.52753
EIF4E
Hrg		-1.06749
NCOA3
4-(2-aminoethyl)benzenesulfonylfluoride		-1.63299
xanthine	-0.183639		0.507673
PI3K (family)	0.909978
PTAFR		0.175507
rottlerin		0.187737
NCOR-LXR-Oxysterol-RXR-9 cis RA			-1.63299
CCR1			1.09109
26s Proteasome	-1.70942
growth factor			1
ATG7	-0.152499	-0.795662
GAS6	1.2464
CTCF		-0.896258
ribavirin
ilomastat		-0.83054
genistein	-0.997484		0.960392
MAPK8IP1
CNR1	0.390567	1.40399
DICER1	0.448174
ERN1			0.535656
E2F3
Map3k7	0.48911	-0.141267	-0.161146
sphingomyelin			2
brodalumab			-2
TASP1
SFN		2
ZNF106
ebselen
TBXT
AXL		1.76587	0.882498
PRKAA1			-0.923381
ELF4	0
pCPT-cAMP
Angiotensin II receptor type 1		-1.98248
NRG4			1.98248
HIST1H1T		2.12132
Hist1h1a		2.12132
zearalenone
KDM1A
D-fructose		0.59222	0.524142
sodium arsenite			-1.13389
MLXIPL			-1.695
nickel
DIO3		0.691564	0.650945
FGFR1	-0.762493		-0.390567
fisetin
BCL2	-1.69832
CD36			-0.2
TEK
miR-7a-5p (and other miRNAs w/seed GGAAGAC)
PECAM1
4-nitroquinoline-1-oxide
sulindac			-1.71499
CAT		-0.881039	-0.270719
zymosan A			1.95083
melatonin	1.09545		-0.040996
2-arachidonoylglycerol
amphotericin B		-1.94878
JAK inhibitor I
ADM			-0.504754
NPC1			-0.80829
nitroprusside		-0.547176	1.15404
terbutaline		1.94145
KAT5	1.06749	1.91237
ETS2			0.915249
VTN			1.21557
CpG ODN 2216	1.06749		1.06749
Wnt
EIF2AK3
TLR8			0.882052
PDPK1
zinc
KLF15			-1.80907
SOX3
ozone			1.22157
neuroprotectin D1		1.06749	-1.15404
rebamipide		0.816497
SYK	0.671915
ciprofloxacin			0.333333
PLAG1
NRTN		1.98052
ITK	-0.733735	-1.07819
NR1I2			1.12015
heme			1
mibolerone			1.44444
NLRP3	-0.900366
isobutylmethylxanthine	1.06878		-0.612126
TGFBR1			1.30931
nocodazole			-0.100377
RHO			0.333333
SIRT6
RARRES2			-0.746729
buthionine sulfoximine
quinolinic acid		0.496334
IFNL1
ATF3			-1.06749
Laminin (complex)			0.742515
clozapine	0.753411
ZFPM1	1.69775
ursodeoxycholic acid		0.493197
MEF2C		1.10537
fasudil		1.13405	-0.625768
oligomycin		-1
Smad2/3-Smad4		1
lithium chloride		0.792406
BIRC3
NTRK1
MAPT
diethylnitrosamine
mir-30
Endothelin		0.254457
IL25		0.750033
SELENOS
luteolin		-0.132135	-0.927173
RBL1
lonafarnib		0.254457
PPARGC1B			-0.8068
CR1L		0.242536
FABP4			1.09109
cuprizone	0.654654	0.647059
VCAN	-1		-0.170251
pimagedine
phenyl-N-tert-butylnitrone			-2.21321
IFNB1	0.0962072		0.134557
metribolone	0.187747	0.517307	-0.292355
LY6E
GW501516
FBXW7			0.738549
GHR		0.640347	-1
CpG ODN 2006	-1.01498	0.652605
ALDH1A2			-1.06749
PTGS1			0.891645
lisinopril		-1	-0.0678844
DGCR8	1		1.34164
LNX2		-1
EWSR1
TNFRSF4	-1.12382	0.417374
OTX2	0.152499	0.578947
ABCA1			-0.285362
clofibrate		-0.586782	-1.18638
beta-naphthoflavone
Ins1			-0.51474
niacinamide		0.492366	1.09109
S100B
TBX21	0.604165
ursolic acid			-1.0663
propofol		0.6	-0.821995
SRC (family)		1.00251
EPHB1			0.927173
N,N-dimethylsphingosine			-1.27413
propranolol		-0.218218	-0.751439
azithromycin			-1
SPRY2		-0.896258
LECT2		-1
diazoxide			1
capsaicin			0.984746
LRP1		0.842484	-0.0383201
BMP
LYN	-0.524142		-0.372572
fenretinide
CLEC7A		-0.454369	0.727607
stearic acid
naltrexone		0.375823
LRPAP1			-1
miR-132-3p (and other miRNAs w/seed AACAGUC)		-1
MTDH
TIRAP
LBP			-0.447214
PPP3CA
ETS1	-0.05547		-1.19523
MAPK9	0.548387		-0.696441
PTPN22		1.05629
propionic acid			1.13137
Mt1			-0.727607
IGHM			-1.09109
Go6983
SART1
GLP-1-(7-34)-amide
ISL1		0.684394
cadmium chloride
P2RX7		-1.06749
isoquercitrin
mir-181			-0.0672673
PTF1A
RARG		0.795662	-0.152499
zVAD-FMK
magnolol		0.242536
TRAF3IP2	-0.864923
KLF3	-2.33333		0.447214
fluocinolone acetonide	0	-0.377964
CBS/CBSL
ZBTB7B
IPMK		0.928477
P2RY2
IL31			1.35168
NRAS
MAP2K6		0.145521
EFNA1
BCL11B		1.25357
C5AR2		1.16518
DNMT3A		-0.380188
KCNK9	0
BAG1	1
IRS1			-0.566825
benzyl isothiocyanate		-1.23091
MGAT5
Stat5 dimer		-1.13137
AIRE
SMARCD3		0.848528
cephaloridine
minocycline			-1.29399
PRKG1	-0.848528		-0.762493
CDK9
vitamin K3
NPC2			-0.83054
PTGER4	0.594089		0.180814
KLRC4-KLRK1/KLRK1		-1.28154
AVP		0.295655
SKI
CHADL		0
IRF5	-0.0336909
zoledronic acid
FGF7	1		0.561414
phorbol 12,13-didecanoate
hydroxyurea
FMR1
mir-15	0.182171	-0.561951
JAK1/2	-1
arginine
alpha-tocopherol
arachidonic acid			0.586356
sanglifehrin A	2
FAAH
wogonin		1
ACTN4
resveratrol	-0.0736938		-0.83336
HNF1B	-0.242536	0.125166	0.149071
PPRC1		0.557086
MMP1			0.529497
domoic acid		0.986711
muromonab-CD3		-1.98248
Cdk	1
indinavir
MBP		-1.11631
CASP1		-0.784987	-0.497096
agmatine
NEUROD1		0.369713
Esrra
CMKLR1
propylthiouracil		-0.0246108
ST8SIA1
ramipril			-0.27735
CYLD			0.942809
AGTR1		-0.365148	0.294118
HIPK2
ZC3H12A		1.30034
LPIN1			0.0195609
2-mercaptoacetate
hemin	1.96396
hymecromone		-1.28745
PTH1R
TAF4	-1.45204
acetylcholine		1.13137
TREM2			-0.578947
grape seed extract
ALOX5			-1.06749
DNMT1		0.530011
FAS	-0.826634	-0.118536	0
cholic acid			-0.214176
L1CAM			1.1094
DDX58	-0.0477546
miR-27a-3p (and other miRNAs w/seed UCACAGU)
SLC13A1
PYCARD		-0.957518
SREBF1		0.153832	-0.49377
SRA1
SUMO3			-0.685994
GNAS		-0.57735
arotinoid acid	-1		-0.156174
mir-8
IFNGR1		1.55345	0.342997
N-(3-oxododecanoyl)-homoserine lactone
N-acetylsphingosine
SOD2			-1.06749
CCR6		-1.41421
DRD2		1.07697
MIR101
octanoic acid			1.09109
CRTC2			0.927173
FHL2
NOTCH2
AHI1		1.34164
NDRG1
AICAR			-1.05377
retinoid	0.152499	0.294118	-0.640184
clenbuterol
CLDN7
KDR
TAB1
HEY2
PTPRC			-0.0799219
miR-31-5p (and other miRNAs w/seed GGCAAGA)
ethyl pyruvate		-0.817303
sucrose
NCOA1			-0.730153
KL
ketoconazole		1.47762
IRAK1		0.776645
pravastatin		0	-1
USF2
IgG1			-0.5547
ATP7B			-1
SEMA7A
LPL
artesunic acid		0.762493
IL1RAP
KAT2B		0.688515
NCR1	1.20142
GPX1			-1.15404
cyclopamine		-0.390567
aroclor 1254		0.804722
DAG1		0.6
CYB5R4
IL17R
sulindac sulfide			1.35381
HAVCR2
NCOR2			0.511992
vitamin K2
CDK5		-1	0
TG		-0.218218	-0.0383201
diazepam		-1.13137
ochratoxin A		0.159674
cytochalasin D
[D-Ala2,N-Me-Phe4,Gly5-ol]-Enkephalin		-0.909628
FOXP3			0.152499
exenatide		1.19452
omeprazole		-0.5547
salirasib		-2
carbonyl cyanide m-chlorophenyl hydrazone
pentoxifylline		-1.17662
clarithromycin		0.780869
MAP3K7
ritonavir
TRH
Fibrinogen
RUNX1	-0.341882		0.200533
Hsp70
chenodeoxycholic acid			0.185534
EZR		-0.233944	-0.089701
ITCH		1.06749
12-(3-adamantan-1-yl-ureido) dodecanoic acid
4-tert-octylphenol
CTGF	-0.720969
triclosan
beraprost		1
dipyridamole		0
chrysotile asbestos
piceatannol		0.390567
cytarabine	0.6		0.589768
irinotecan
CLEC11A		-1.12339	0.152499
PRKAR1A
LPAR1			0.152499
TF
PDE5A
LTBR			0.447214
CLEC4G
KCNIP3	0.5547	0.370739
CASZ1		0
MAP3K3	0
Mt2			-0.390567
PTK2B
LDLR	-1.73205		-0.254457
UCHL1
phenobarbital
caffeine		0.870894	0.0651203
GIP
NR5A2	-0.827981		-0.456886
FKBP4
HMGA1	-0.369406		0.683898
ILK
C1q
Tnf receptor
murabutide			1
fontolizumab
HSPA9		1
SHC1
TRAF3	-0.294963		0.60547
proteasome inhibitor PSI
HOXA10
Foxp1		1.34164
cannabidiol		-1.16518
prostaglandin E1
miR-92a-3p (and other miRNAs w/seed AUUGCAC)
superoxide			0.784987
CD3E	-0.281391	0.743793
TXK
TXNIP			0.120551
leucine			-1.15404
SR 144528
NFAT5
bryostatin 1			0.439953
DBP			-1
NfkB-RelA		-0.0345742
FOSL2
RARB
andrographolide			-1.446
GNAI3
CDX1		-1.98248
daidzein
JAK3		0.0734007
selenium			0.746729
VGLL3
plumbagin
KLK5
dydrogesterone
LRP5
HES1
ADORA2A	0.116941
hexamethylene bisacetamide
SCAVENGER receptor CLASS A			0
ESRRA
GRP
C5
NFIL3
SIX5
WNT7A
PDCD4
CKS1B
ADA
DMP1
Stat3-Stat3
manumycin A
INSIG2
AMH
S-nitroso-N-acetylpenicillamine		0.980966
TNFSF4		-0.94634
NAMPT
PLP1		-0.984091
IL12RB2		-0.340342
K+
EFNA4
curdlan	0.152499
CSF2RA
baclofen
C1QA
CCL21		-0.746729
ACKR2
EFNA2
EFNA5
naloxone		1.11568
chitin
STAT2
MMP2			-0.117041
estradiol benzoate			0.87692
APOA4		0.749532
Calmodulin
SIRT1
Lymphotoxin		-0.848528
CD5	-0.5547
RBP1
dexmedetomidine		1
dichloroacetic acid		-0.5547
UXT			-0.282843
CDX2		-0.0678844
ADP
mir-1
ICOSLG/LOC102723996		-0.988149
LIPG			0.467606
romidepsin
AIMP1		-1.22462
GPER1		0.945437
acadesine			1.09109
MED13		-0.447214	0
TIMP1			0.816497
leukotriene C4		-0.950437
CXCR2		0.218218
SIN3A
TENM1
hydrogen sulfide
gambogic acid
biochanin A
ethidium
prazosin
non-esterified fatty acid
taurocholic acid
5'-methylthioadenosine
DTNBP1		1
ARHGDIG
CAPN3
Adaptor protein 1
estriol
N(2)-(gamma-D-glutamyl)-meso-2,2'-diaminopimelic acid
CDK5R1		1
ANKRD17	1
NF 449
STAR
alpha-amanitin
IDO1			-1
salinosporamide A
SLC30A3
SAV1
dithiothreitol
carbenoxolone
clioquinol
8,9-epoxyeicosatrienoic acid
ARG1		-2
CFB			1
IntegrinÎ±
calyculin A		-1
ibudilast
KLF13		-1
NEUROG2
5A apoA-I mimetic peptide		-1
ARRB1
SMOC2
retinol
CDN1163			1
ATP2A2			1
2-aminopurine		0.440086
FZD8		0
ADAM15
ADIPOR1
rhodamine 6G
RTKN
L-type Calcium Channel
TLX3
ENG
cyclic guanosine monophosphate-adenosine monophosphate
S100A7
immune complex
ABCA4
SULF2
cucurbitacin B
cytidylyl-3'-5'-guanosine
CXCL3
gamma-tocotrienol
paricalcitol
farnesyl pyrophosphate
CRX
allopregnanolone		1.9799
noscapine
EDN3
SLC6A1
PON1
CHD7
IFNA8
BMP15
IFNA10
IFNA16
IFNA7
IFNA5
IFNA6
IFNA14
NFYA
IL36A
PD 153035
CXCR4
IFNA21
TNFSF9
U46619
isoliquiritigenin
RALA
ARRB2
dichlororibofuranosylbenzimidazole
MAPK10
CCL3L3
naphthalene
temozolomide
PFDN6
TCF
FNDC5
MEF2
GNB3
anti-benzo(a)pyrene-diol-epoxide
Cdc42
SERCA
WR 1065
RCAN1
huperzine A
SOCS2
thiazolidinedione
SPHK2
monocrotaline
poly dA-dT
mir-33
ITGAL
IGFBP2			-0.585206
IL1R2
ZNF281
methylnitronitrosoguanidine
Sik1			-0.297569
IGF2BP1
DNASE2
RASSF5
FGF4
CR2
LGR4
2-methoxyestradiol	0.371391
PHB2
IL18BP
green tea polyphenol			-0.546869
LRP6			-0.816932
thioctic acid		0.112509
BECN1		0.728082
Il8r
mir-193
GFI1
epirubicin
COMMD1
TSC1
COMMD3-BMI1
berberine		-0.824621	0.076612
CD3 group			0.431331
SMAD1
MLX			-0.658505
3,3'-diindolylmethane
RASGRF1
HSPA1A/HSPA1B
CREM	-0.482192		0.266398
SPHK1			0.497127
ceramide		-0.2
vorinostat	0.0887357		-0.355543
vasoactive intestinal peptide			-0.632681
naringenin
betamethasone		0
FBXO32	-0.447214
APLN	-0.264135	0.520306
MTA1		0.454258
PIM2
GHRH		-0.293455
cyclopiazonic acid		-0.0246108
FZR1
FPR2
TRAIP		1.06749
TCF7L1
Rxr
dicarbethoxydihydrocollidine
NOTCH4
UCP1
SIK3
GHRHR
ACACB
DAZ2
DLL4		-0.565032
RORC
imipramine blue
ASXL1			1.34164
ASXL2			-1.34164
batimastat
NTN1
SERPINA1
vemurafenib
HDL-cholesterol			-0.447214
SOX10		-1
LGALS9
halofuginone
ABCB4
linsidomine			-0.527589
IL32			-0.229668
SIK1/SIK1B			1.02968
S1PR2
EFNA3
ZBTB17
FLI1
SUMO1		-0.762493
CCL19		-0.0561656
di(2-ethylhexyl) phthalate			-0.314485
GCK
IFI16	0.57735
irbesartan
TACR1		-1.23091
MTORC1			-0.448977
PFKFB3
DDIT3	0
celecoxib			-0.971854
IL18R1		-0.421825
deoxycorticosterone acetate
RNF31
CITED2		-0.0638877
HAVCR1		-0.57735
TNFRSF25		0.57735
HDAC7
miR-128-3p (and other miRNAs w/seed CACAGUG)		-1.1767
UTP
IFN type 1
mir-34		0.202031
lithocholic acid		0.467606
PD 123319			1
HOXA9
ZAP70	0.152499		1.4
CALR		0.817624
Smad
CD46		1.54303
IL37
SMAD2	0.928477
SNAI2	-0.218218
Relaxin			0.152499
FADD	0.0628695		0.2
PPT1	0	0.108465
thyroid hormone			-0.894737
Ras homolog
IL17a dimer		-0.864923
FNIP1
IL24	-0.492428	-0.454212
GRHL2
BSG		0.823213
PDGF-AA
NQO1			-0.896258
TNFRSF8	-0.707508
LTB4R			0
NFATC4
LY86			0.728082
methyl-beta-cyclodextrin
highly active antiretroviral therapy
GLI2
FOSB		-0.218218	-0.312117
GATA4		-0.482998
PRKD1			1.10265
CX3CL1
acetaminophen
L-threonine
honokiol		0	-0.6
TRIB3
BATF
ketamine		0.140028
HDAC2
geldanamycin
interferon beta-1a
CBX5		-0.904534
PROCR
ENTPD1
ORMDL3
LRAT
LHX2
everolimus
IGFBP5
mir-203		0.685994
ferulic acid
Cyp2c23
LILRB1
DKK1	0.848528
Ppp2c
PAK1
MC4R
UHRF2
amino acids
HOXD3
HRG
rosuvastatin
SLC2A4
thiocoraline
eflornithine			1.34164
LMX1B
TYR
betaine
HOXB13
PAX8		1.33717
SOX9	-0.6	-0.364775
LEF1	-0.649956
SUMO2
CD9
IL1RL1		-0.281818
dasatinib
Hmgb1		0.739425
HHEX		-1.05337
SFTPD		-0.771389
ITIH1		1.13137
MIR200
PLC		-1
VIPR1		1.16518
EBI3			0.621122
riboflavin
picropodophyllin
L-lactic acid
SOX17
theophylline
IGFBP4
IRF9	-1.10265
Tetanospasmin
KISS1
EBF2
GJA1		-1.23091
NfkB1-RelA
NPY		0.0526316
PPP3R1
CYBB		-0.140028
silymarin		0.207514
IRAK2
lenalidomide			-0.83205
DL-fructose
PLCG2
IRF3	-0.448874		0.040996
mir-31
ITGA6
DUSP6
oleoyl-estrone
[truncated: 3,490 more rows]
